# Supplementary material
Source: PubMed Central journal article supplement (PMC7518134)
Supplement: Keller_Appendix_.pdf [file Keller_Appendix_.pdf]

## Appendix

Table 1. Glucocorticoid products included and excluded from definition of systemic glucocorticoids

Table 2. Variables, Missing, Included in Model, How Handled

Figure 1. Flow chart

**Table 1. Glucocorticoid Products Included and Excluded from Definition of Systemic Glucocorticoids**

| <b>Glucocorticoid Product</b>                                          | <b>Included/Excluded</b> |
|------------------------------------------------------------------------|--------------------------|
| betamethasone acetate and sodium phos 6 mg/mL suspension for injection | Excluded                 |
| budesonide 0.5 mg/2 mL suspension for nebulization                     | Excluded                 |
| dexamethasone 0.5 mg tablet                                            | Included                 |
| dexamethasone 1.5 mg tablet                                            | Included                 |
| dexamethasone 4 mg tablet                                              | Included                 |
| dexamethasone sodium phosphate 10 mg/mL injection solution             | Included                 |
| dexamethasone sodium phosphate 4 mg/mL injection solution              | Included                 |
| fludrocortisone 0.1 mg tablet                                          | Excluded                 |
| hydrocortisone 1 % topical ointment                                    | Excluded                 |
| hydrocortisone 10 mg tablet                                            | Included                 |
| hydrocortisone 2.5 % topical cream                                     | Excluded                 |
| hydrocortisone 2.5 % topical cream with perineal applicator            | Excluded                 |
| hydrocortisone 2.5 % topical ointment                                  | Excluded                 |
| hydrocortisone 5 mg tablet                                             | Included                 |
| hydrocortisone sodium succinate 100 mg solution for injection          | Included                 |
| methylprednisolone 4 mg tablet                                         | Included                 |
| methylprednisolone 4 mg tablets in a dose pack                         | Included                 |
| methylprednisolone sodium succinate 1,000 mg intravenous solution      | Included                 |
| prednisolone 15 mg/5 mL oral solution                                  | Included                 |
| prednisolone acetate 1 % eye drops, suspension                         | Excluded                 |
| prednisone 1 mg tablet                                                 | Excluded                 |
| prednisone 10 mg tablet                                                | Included                 |
| prednisone 20 mg tablet                                                | Included                 |
| prednisone 5 mg tablet                                                 | Included                 |
| prednisone 5 mg/5 mL oral solution                                     | Included                 |
| prednisone 50 mg tablet                                                | Included                 |
| triamcinolone acetonide 0.1 % dental paste                             | Excluded                 |
| triamcinolone acetonide 0.1 % topical cream                            | Excluded                 |
| triamcinolone acetonide 0.1 % topical ointment                         | Excluded                 |

**Table 2. Variables, Missing, Included in Model, How Handled**

| Variable                  | # Missing (n=1806) | Candidate for Model | Fell Out: Primary Analysis | Excluded: Secondary Analysis | Note                                                                                                                          |
|---------------------------|--------------------|---------------------|----------------------------|------------------------------|-------------------------------------------------------------------------------------------------------------------------------|
| Mortality                 | None               | X                   |                            |                              | None missing                                                                                                                  |
| Mechanical Ventilation    | None               | X                   |                            |                              | Order for Vent respiratory rate or tidal volume. If not present assumed not on ventilator.                                    |
| Glucocorticoids           | None               | X                   |                            |                              | Order for systemic steroids. If not present, assumed no steroids.                                                             |
| Age                       | None               | X                   |                            |                              | None missing                                                                                                                  |
| Smoking                   | 602                | X                   | X                          |                              | 602 missing. In table 1 only present values reported. In MV analysis variable was categorized and missing was assumed normal. |
| Male                      |                    | X                   | X                          |                              | None missing                                                                                                                  |
| Female                    |                    | X                   | X                          |                              | None missing                                                                                                                  |
| Race                      | See note           | X                   |                            |                              | Included 694 "other", 73 "declined", and 91 "unavailable"                                                                     |
| Ethnicity                 | See note           | X                   |                            |                              | Included 964 "Not Spanish", 73 "declined", and 93 "unavailable" and 24 "Unknown"                                              |
| Race/Ethnicity Combined   | 327                | X                   |                            |                              | When combined, Race/Ethnicity yielded 327 "Other/Unknown" which was treated as a separate category.                           |
| Initial oxygen saturation | None               | X                   |                            |                              | None missing                                                                                                                  |
| Body mass index           |                    | X                   |                            |                              | 179 missing. In table 1 only present values reported. In MV analysis variable was categorized and missing was assumed normal. |
| Admission Temperature     | None               | X                   | X                          |                              | None missing                                                                                                                  |
| Peak Temp during Hosp     | None               |                     |                            |                              | None missing                                                                                                                  |
| Charlson score            | None               | X                   |                            |                              | None missing                                                                                                                  |
| Hypertension              | None               | X                   |                            |                              | Searched for diagnosis code. If no code present, assumed normal.                                                              |
| COPD                      | None               | X                   |                            |                              | Searched for diagnosis code. If no code present, assumed normal.                                                              |
| Diabetes                  | None               | X                   |                            |                              | Searched for diagnosis code. If no code present, assumed normal.                                                              |
| Coronary Artery Disease   | None               | X                   |                            |                              | Searched for diagnosis code. If no code present, assumed normal.                                                              |
| HIV                       | None               | X                   |                            |                              | Searched for diagnosis code. If no code present, assumed normal.                                                              |
| ESRD/Dialysis             | None               | X                   |                            |                              | Searched for diagnosis or CPT code. If no code present, assumed normal.                                                       |
| WBC (k/ $\mu$ L)          | 5                  | X                   |                            |                              | 5 missing. In table 1 only present values reported. In MV analysis variable was categorized and missing was assumed normal.   |

| <b>Table 2. Variables, Missing, Included in Model, How Handled (continued)</b> |                           |                            |                                   |                                     |                                                                                                                               |
|--------------------------------------------------------------------------------|---------------------------|----------------------------|-----------------------------------|-------------------------------------|-------------------------------------------------------------------------------------------------------------------------------|
| <b>Variable</b>                                                                | <b># Missing (n=1806)</b> | <b>Candidate for Model</b> | <b>Fell Out: Primary Analysis</b> | <b>Excluded: Secondary Analysis</b> | <b>Note</b>                                                                                                                   |
| Platelets (k/ $\mu$ L)                                                         | 5                         | X                          |                                   |                                     | 5 missing. In table 1 only present values reported. In MV analysis variable was categorized and missing was assumed normal.   |
| Sodium (mEq/L)                                                                 | 15                        | X                          |                                   |                                     | 15 missing. In table 1 only present values reported. In MV analysis variable was categorized and missing was assumed normal.  |
| Potassium (mEq/L)                                                              | 26                        | X                          |                                   |                                     | 26 missing. In table 1 only present values reported. In MV analysis variable was categorized and missing was assumed normal.  |
| CRP (mg/dL)                                                                    | 359                       | X                          |                                   | X                                   | 359 missing. In table 1 only present values reported. In MV analysis variable was categorized and missing was assumed normal. |
| D-dimer ( $\mu$ g/mL)                                                          | 536                       | X                          |                                   | X                                   | 536 missing. In table 1 only present values reported. In MV analysis variable was categorized and missing was assumed normal. |
| Creatinine (mg/dL)                                                             | None                      | X                          |                                   |                                     | None missing                                                                                                                  |
| Troponin T (ng/mL)                                                             | 258                       | X                          |                                   | X                                   | 258 missing. In table 1 only present values reported. In MV analysis variable was categorized and missing was assumed normal. |
| IL-6 (pg/mL)                                                                   | 1300                      |                            |                                   |                                     | 1300 missing. Variable removed from the analysis.                                                                             |
| LDH ( $\mu$ g/L)                                                               |                           | X                          |                                   | X                                   | 227 missing. In table 1 only present values reported. In MV analysis variable was categorized and missing was assumed normal. |
| Fibrinogen (mg/dL)                                                             | 1000                      |                            |                                   |                                     | 1000 missing. Variable removed from the analysis.                                                                             |
| Ferritin (ng/mL)                                                               | 680                       | X                          |                                   | X                                   | 680 missing. In table 1 only present values reported. In MV analysis variable was categorized and missing was assumed normal. |
| CK (U/L)                                                                       | 336                       | X                          |                                   | X                                   | 336 missing. In table 1 only present values reported. In MV analysis variable was categorized and missing was assumed normal. |
| AST (U/L)                                                                      | 60                        | X                          |                                   |                                     | 60 missing. In table 1 only present values reported. In MV analysis variable was categorized and missing was assumed normal.  |
| Glucose (mg/dL)                                                                | 263                       | X                          |                                   | X                                   | 263 missing. In table 1 only present values reported. In MV analysis variable was categorized and missing was assumed normal. |
| Lymphocytes (k/ $\mu$ L)                                                       | 5                         | X                          |                                   |                                     | 5 missing. In table 1 only present values reported. In MV analysis variable was categorized and missing was assumed normal.   |

**Table 2. Variables, Missing, Included in Model, How Handled (continued)**

| <b>Variable</b>         | <b># Missing (n=1806)</b> | <b>Candidate for Model</b> | <b>Fell Out: Primary Analysis</b> | <b>Excluded: Secondary Analysis</b> | <b>Note</b>                                                                                                                   |
|-------------------------|---------------------------|----------------------------|-----------------------------------|-------------------------------------|-------------------------------------------------------------------------------------------------------------------------------|
| Procalcitonin (ng/mL)   | 754                       | X                          |                                   | X                                   | 754 missing. In table 1 only present values reported. In MV analysis variable was categorized and missing was assumed normal. |
| DNR                     | None                      |                            |                                   |                                     | Searched for order. If no order found, assumed normal/absent.                                                                 |
| DNI                     | None                      |                            |                                   |                                     | Searched for order. If no order found, assumed normal/absent.                                                                 |
| DNR or DNI on Admission | None                      | X                          |                                   |                                     | Searched for order. If no order found, assumed normal/absent. Coded as present if order entered within 48 hours of admission. |
| Hydroxychloroquine      | None                      | X                          | X                                 |                                     | Searched for order. If no order found, assumed normal/absent.                                                                 |
| High Flow Nasal Cannula | None                      |                            |                                   |                                     | Searched for order. If no order found, assumed normal/absent.                                                                 |
| New Dialysis            | None                      |                            |                                   |                                     | Searched for order. If no order found, assumed normal/absent.                                                                 |

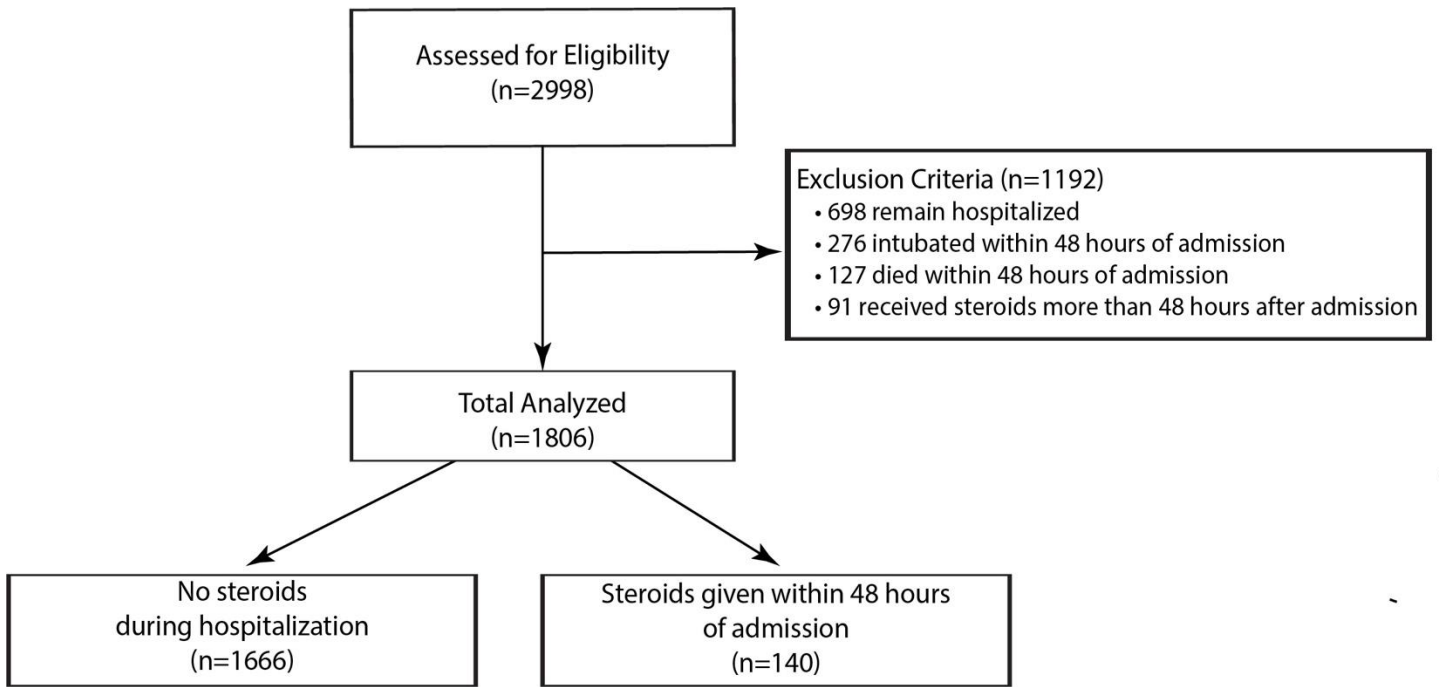

**Figure 1: Flow chart**
